# Supplementary material for: Prospective comparison of a PCR assay and a microbiological culture technique for identification of pathogens from blood and non-blood samples in septic patients
Source: PubMed Central journal article supplement (PMC4654802; doi:10.1186/s40560-015-0116-1), 2015-11-21
Supplement: 40560_2015_116_MOESM1_ESM.pdf [file 40560_2015_116_MOESM1_ESM.pdf]

## Supplement 1. Conversion charts.

Chart 1. Scoring table for amount of DNA, yielded from blood samples.

|                        |     |      |
|------------------------|-----|------|
| > 0 to 0.2 ng/ $\mu$ l | ... | +    |
| 0.2 to 0.5 ng/ $\mu$ l | ... | ++   |
| 0.5 to 1.0 ng/ $\mu$ l | ... | +++  |
| > 1.0 ng/ $\mu$ l      | ... | ++++ |

Chart 2. Scoring table for amount of pathogens, yielded from fluid secrets, abscess fluid and smears.

|                         |     |      |
|-------------------------|-----|------|
| very few – low quantity | ... | +    |
| moderate quantity       | ... | ++   |
| many – very many        | ... | +++  |
| plentiful               | ... | ++++ |

Chart 3. Scoring table for amount of DNA, yielded from fluid secrets, abscess fluid and smears.

|                          |     |      |
|--------------------------|-----|------|
| > 0 to 0.9 ng/ $\mu$ l   | ... | +    |
| 1.0 to 9.9 ng/ $\mu$ l   | ... | ++   |
| 10.0 to 29.9 ng/ $\mu$ l | ... | +++  |
| > 30 ng/ $\mu$ l         | ... | ++++ |
