# Supplementary material for: Prospective comparison of a PCR assay and a microbiological culture technique for identification of pathogens from blood and non-blood samples in septic patients
Source: PubMed Central journal article supplement (PMC4654802; doi:10.1186/s40560-015-0116-1), 2015-11-21
Supplement: 40560_2015_116_MOESM2_ESM.pdf [file 40560_2015_116_MOESM2_ESM.pdf]

Supplement 2. Clinical details of 27 septic episodes, where MC technique failed and PCR identified pathogen microorganisms\*.

| Focus of infection | Severity of sepsis | PCT ng/ml | Calculated anti-infective therapy    | Sample  | PCR result                                          | Clinical decision on further therapy                      |
|--------------------|--------------------|-----------|--------------------------------------|---------|-----------------------------------------------------|-----------------------------------------------------------|
| FUO                | SSS                | 0.1       | Piperacillin/Tazobactam, Fluconazole | Blood   | <i>S. aureus</i> (++)**                             | Meropenem/Ciprofloxacin because of persistent fever       |
| Abdomen            | SSS                | 38.6      | Piperacillin/Tazobactam              | Ascites | <i>E. coli</i> (+)                                  | Piperacillin/Tazobactam continued                         |
| FUO                | SS                 | 0.1       | none                                 | Blood   | <i>S. epidermidis</i> (++++)                        | Piperacillin/Tazobactam after abdominal hematoma excision |
| Wound              | SS                 | 0.3       | Cefuroxim                            | Blood   | <i>S. aureus</i> (+++), <i>S. epidermidis</i> (++)  | Meropenem/Ciprofloxacin because of suspected pneumonia    |
| CVC                | SSS                | 0.41      | Meropenem, Vancomycin<br>Fluconazole | Blood   | <i>S. aureus</i> (+++)                              | Ampicillin/Sulbactam because of suspected CVC infection   |
| Lung               | SS                 | 0.1       | Gentamicin, Ceftriaxon               | BS      | <i>S. aureus</i> (++)                               | Meropenem/Ciprofloxacin because of suspected pneumonia    |
| FUO                | SS                 | 1.8       | Cefuroxim                            | Blood   | <i>S. epidermidis</i> (++) , <i>E. faecium</i> (++) | Meropenem/Ciprofloxacin                                   |
| FUO                | SS                 | 0.14      | Ceftriaxon                           | Blood   | <i>S. epidermidis</i> (+++)                         | Death at ICU                                              |
| FUO                | SS                 | 0.1       | Clindamycin, Cefotiam                | Blood   | <i>S. epidermidis</i> (+++)                         | New CVC because of suspected CVC infection                |
| FUO                | SSS                | 1.8       | Piperacillin/Tazobactam              | Blood   | <i>S. aureus</i> (+)                                | New CVC because of suspected CVC infection                |
| FUO                | SSS                | 2.86      | Gentamicin/Ceftriaxon                | Blood   | <i>S. epidermidis</i> (+++), <i>E. faecium</i> (++) | Meropenem/Ciprofloxacin, no sepsis focus found            |
| FUO                | SSS                | 2.8       | Meropenem/Ciprofloxacin              | Blood   | <i>E. faecium</i> (+)                               | Meropenem/Ciprofloxacin and Vancomycin                    |
| FUO                | SS                 | 0.1       | Cefuroxim                            | Blood   | <i>S. epidermidis</i> (+++)                         | Imipenem and new CVC                                      |
| Abdomen            | SSS                | 0.36      | none                                 | Blood   | <i>S. aureus</i> (++++)                             | Piperacillin/Tazobactam after colon resection             |
| FUO                | SS                 | 16.5      | Imipenem                             | Blood   | <i>S. epidermidis</i> (+++)                         | New CVC because of suspected CVC infection                |

|         |     |      |                                        |       |                                                                                |                                                            |
|---------|-----|------|----------------------------------------|-------|--------------------------------------------------------------------------------|------------------------------------------------------------|
| FUO     | SSS | 0.59 | none                                   | Blood | <i>S. epidermidis</i> (++)                                                     | Ampicillin/Sulbactam because of suspected CVK infection    |
| FUO     | SS  | 0.11 | none                                   | Blood | <i>C. albicans</i> (+++), <i>S. epidermidis</i> (++)                           | Meropenem/Ciprofloxacin                                    |
| FUO     | SSS | 0.15 | none                                   | Blood | <i>S. epidermidis</i> (+), <i>C. albicans</i> (+)                              | None                                                       |
| FUO     | SS  | 0.11 | Ciprofloxacin                          | Blood | <i>P aeruginosa</i> (+++), <i>S. epidermidis</i> (+)                           | Ciprofloxacin because of suspected urinary tract infection |
| FUO     | SSS | 0.1  | Imipenem, Ciprofloxacin, Fluconazole   | Blood | <i>S. epidermidis</i> (+)                                                      | CVC removal                                                |
| Lung    | SS  | 0.14 | Tobramycin, Ceftazidin, Linezolid      | BS    | <i>E. faecium</i> (+++), <i>C. albicans</i> (+)                                | De-escalation to Linezolid due to clinical symptoms        |
| FUO     | SSS | 0.12 | none                                   | Blood | <i>S. epidermidis</i> (++)                                                     | Portcath removal                                           |
| FUO     | SSS | 0.15 | Piperacillin/Tazobactam                | Blood | <i>S. epidermidis</i> (++) , <i>S. aureus</i> (++++)                           | CVC removal                                                |
| FUO     | SS  | 0.28 | Piperacillin/Tazobactam, Fluconazole   | Blood | <i>S. epidermidis</i> (+), <i>K. pneumoniae</i> (+)                            | Piperacillin/Tazobactam                                    |
| FUO     | SS  | 0.12 | Meropenem, Ciprofloxacin               | Blood | <i>K. pneumoniae</i> (+)                                                       | Piperacillin/Tazobactam                                    |
| Abdomen | SSS | 2.23 | Piperacillin/Tazobactam<br>Fluconazole | Blood | <i>P. aeruginosa</i> (+++), <i>E. cloacae</i> (++)                             | Meropenem, Ciprofloxacin, Fluconazole                      |
| Abdomen | SSS | 0.43 | none                                   | Blood | <i>S. aureus</i> (++++), <i>S. epidermidis</i> (++) ,<br><i>E. faecium</i> (+) | Ciprofloxacin, Piperacillin/Tazobactam, Fluconazole        |

FUO: fever of unknown origin; S: sepsis; SS: severe sepsis; SSS: septic shock; CVC: central venous catheter.

\*PCR results were not taken into account to improve the anti-infective therapy of sepsis. Anti-infective therapy was changed only according to clinical course of the disease.

\*\* (+) represents the score for DNA concentration according to conversion chart 1, Supplement 1.
