# Supplementary material for: Prospective comparison of a PCR assay and a microbiological culture technique for identification of pathogens from blood and non-blood samples in septic patients
Source: PubMed Central journal article supplement (PMC4654802; doi:10.1186/s40560-015-0116-1), 2015-11-21
Supplement: 40560_2015_116_MOESM3_ESM.pdf [file 40560_2015_116_MOESM3_ESM.pdf]

Supplement 3. Thirty-five septic episodes with potential time-saving effect of PCR vs. MC technique in identification of pathogen microorganisms

| Focus of infection | Initial anti-infective (AI) therapy                  | New AI therapy after MC diagnostics                                       | Causative pathogen (CP)                         | Date & time of PCR result | Date & time of MC result | Time-saving effect (h) |
|--------------------|------------------------------------------------------|---------------------------------------------------------------------------|-------------------------------------------------|---------------------------|--------------------------|------------------------|
| Lung               | Meropenem                                            | Ciprofloxacin/ Ceftazidime                                                | <i>P. aeruginosa</i>                            | 2. Nov. 20:30             | 4. Nov. 8:00             | 35.5                   |
| Lung               | Ceftriaxone                                          | Meropenem/ Ciprofloxacin                                                  | <i>S. aureus, Enterococi</i>                    | 16. Nov. 22:30            | 19. Nov. 8:00            | 17.5                   |
| Abscess            | Imipenem/ Ampicillin/ Fluconazole                    | Meropenem/ Ciprofloxacin/ Fluconazole                                     | <i>P. aeruginosa, E. cloacae, K. pneumoniae</i> | 26. Nov. 19:00            | 27. Nov. 18:00           | 23                     |
| Abdomen            | Piperacillin/ Tazobactam                             | Imipenem/ Ciprofloxacin                                                   | <i>Enterococi</i>                               | 11. Jan. 11:30            | 14. Jan. 8:00            | 34.5                   |
| Lung               | Ceftriaxone                                          | Fluconazole                                                               | <i>C. albicans</i>                              | 16. Jan. 16:00            | 18. Jan. 8:00            | 40                     |
| Lung               | Ceftriaxone                                          | Ciprofloxacin/ Meropenem/ Fluconazole                                     | <i>E. cloacae, C. albicans</i>                  | 14. Feb. 12:30            | 16. Feb. 14:00           | 49.5                   |
| Wound              | Imipenem                                             | Imipenem/ Vancomycin                                                      | <i>E. faecium, CoNS</i>                         | 16. Oct. 18:30            | 17. Oct. 12:00           | 17.5                   |
| Abdomen            | Vancomycin                                           | Vancomycin/ Ciprofloxacin                                                 | <i>E. cloacae</i>                               | 24. Oct. 20:30            | 26. Oct. 16:00           | 43.5                   |
| Abdomen            | Imipenem                                             | Imipenem/ Fluconazole                                                     | <i>C. albicans</i>                              | 29. Nov. 19:30            | 30. Nov. 14:00           | 18.5                   |
| Kidney             | Cefotiam                                             | AI therapy ceased                                                         | <i>No CP identified</i>                         | 14. Oct. 17:00            | 18. Oct. 8:00            | 31                     |
| Lung               | Clindamycin/ Cefotiam                                | Meropenem/ Ciprofloxacin                                                  | <i>P. aeruginosa, E. coli, K. pneumoniae</i>    | 21. Jan. 16:00            | 22. Jan. 17:00           | 25                     |
| Abdomen            | Piperacillin/ Tazobactam                             | Piperacillin/ Tazobactam/ Vancomycin                                      | <i>E. faecium</i>                               | 22. Sep. 20:00            | 24. Sep. 11:00           | 39                     |
| Abscess            | Meropenem                                            | Meropenem/ Cefepime                                                       | <i>P. aeruginosa</i>                            | 05. Oct. 24:00            | 11. Oct. 12:00           | 24                     |
| Abscess            | Piperacillin/ Tazobactam                             | Piperacillin/ Tazobactam/ Fluconazole                                     | <i>C. albicans</i>                              | 21. Nov. 5:30             | 23. Nov. 10:00           | 52.5                   |
| CSF                | Ampicillin/ Sulbactam                                | Ampicillin/ Sulbactam/ Vancomycin                                         | <i>S. epidermidis in CSF</i>                    | 13. Feb. 14:30            | 15. Feb. 17:00           | 50.5                   |
| Lung               | Piperacillin/ Tazobactam/ Ciprofloxacin/ Fluconazole | AI therapy ceased (symptoms due to lung fibrosis and heart insufficiency) | <i>No CP identified</i>                         | 3. Nov. 18:30             | 6. Nov. 13:00            | 66.5                   |
| Lung               | Ciprofloxacin/ Ceftazidim/ Fluconazole               | Imipenem/ Fluconazole                                                     | <i>E. cloacae</i>                               | 4. Dec. 24:00             | 6. Dec. 15:00            | 39                     |

| Focus of infection | Initial anti-infective (AI) therapy   | New AI therapy after MC diagnostics                             | Causative pathogen (CP)              | Date & time of PCR result | Date & time of MC result | Time-saving effect (h) |
|--------------------|---------------------------------------|-----------------------------------------------------------------|--------------------------------------|---------------------------|--------------------------|------------------------|
| CVK                | Meropenem/ Ciprofloxacin              | Ampicillin/ Ciprofloxacin                                       | <i>E. faecalis</i>                   | 21.Nov. 2:30              | 23. Nov. 16:00           | 61.5                   |
| Lung               | Imipenem/ Vancomycin/ Voriconazol     | Imipenem ( <b><i>3 MC tests did not yield CP</i></b> )*         | <i>No CP identified</i>              | 15. Dec. 24:00            | 20. Dec. 20:00           | 116                    |
| Wound              | Piperacillin/ Tazobactam              | AI therapy ceased ( <b><i>2 MC tests did not yield CP</i></b> ) | <i>No CP identified</i>              | 22. Dec. 18:30            | 27. Dec. 8:00            | 109.5                  |
| Abscess            | Cefotiam/ Clindamycin/ Vancomycin     | Cefotiam/ Clindamycin                                           | <i>S. aureus</i>                     | 25. Dec. 14:00            | 27. Dec. 8:00            | 42                     |
| Lung               | Fluconazole                           | AI therapy ceased                                               | <i>No CP identified</i>              | 09. Mar. 12:00            | 11. Mar. 8:00            | 44                     |
| Lung               | Meropenem/ Ciprofloxacin              | Cefotiam ( <b><i>first 3 MC tests did not yield CP</i></b> )    | <i>E. coli</i>                       | 18. Mar. 11:30            | 24. Mar. 9:00            | 141.5                  |
| Abscess            | Piperacillin/ Tazobactam/ Clindamycin | Continued ( <b><i>first 2 MC tests did not yield CP</i></b> )   | <i>S. aureus</i>                     | 23. Sep. 13:30            | 27. Sep. 12:00           | 94.5                   |
| Lung               | Meropenem/ Ciprofloxacin              | continued                                                       | <i>P. aeruginosa</i>                 | 15. Oct. 12:00            | 18. Oct. 8:00            | 68                     |
| Abdomen            | Imipenem                              | continued                                                       | <i>E. coli, Enterococci</i>          | 25. Oct. 21:30            | 28. Oct. 14:00           | 64.5                   |
| Abdomen            | Imipenem/ Vancomycin                  | continued                                                       | <i>Resistant Enterococci</i>         | 11. Nov. 21:00            | 18. Nov. 12:00           | 159                    |
| Kidney             | Piperacillin/ Tazobactam              | continued                                                       | <i>E. coli, E. faecalis in urine</i> | 20. Nov. 3:30             | 22. Nov. 9:00            | 53.5                   |
| Wound              | Meropenem/Ampicillin                  | continued ( <b><i>first MC test did not yield CP</i></b> )      | <i>E. cloacae</i>                    | 25. Nov. 22:00            | 01. Dec. 8:00            | 130                    |
| Abdomen            | Imipenem                              | continued as prophylaxis of necrotizing pancreatitis            | <i>No CP identified</i>              | 21.11., 24:00             | 24.11., 9:00             | 57                     |
| Lung               | Meropenem/ Ciprofloxacin/ Linezolid   | continued                                                       | <i>E. coli, K. pneumoniae</i>        | 20. Dec. 10:30            | 22. Dec. 8:00            | 45.5                   |
| CVC                | No AI therapy                         | No AI therapy, clinical situation improved after CVC withdrawal | <i>P. aeruginosa, E. faecium</i>     | 17. Jan. 20:00            | 19. Jan. 8:00            | 36                     |
| CVC                | Imipenem/ Ceftriaxone                 | continued ( <b><i>first 3 MC tests did not yield CP</i></b> )   | <i>K. pneumoniae</i>                 | 9. Dec. 12:30             | 13. Dec. 9:00            | 92.5                   |
| Abdomen            | Imipenem/ Ciprofloxacin               | continued ( <b><i>first 3 MC tests did not yield CP</i></b> )   | <i>Enterococci</i>                   | 13. Jan. 8:30             | 17. Jan. 8:00            | 95.5                   |
| Lung               | Meropenem/ Ciprofloxacin              | continued                                                       | <i>E. cloacae</i>                    | 17. Mar. 17:00            | 21. Mar. 8:00            | 87                     |

MC: microbiological culture; AI: anti-infective; CP: causal pathogen; CVC: central venous catheter; CoNS: *coagulase-negative staphylococci*; CSF – cerebrospinal fluid.

\*The explanations for outlier values of potential time-sparing effect are given in bold italics
